# Supplementary material
Source: HighWire-hosted journal article supplement (https://bmjophth.bmj.com/content/8/1/e001411)
Supplement: inline-supplementary-material-1 [file inline-supplementary-material-1.pdf]

Supplementary Table 1  
Confusion matrices for two and three classes

| Confusion matrix for two classes |                           |                           |              |
|----------------------------------|---------------------------|---------------------------|--------------|
|                                  | <b>Predicted Positive</b> | <b>Predicted Negative</b> | <b>Total</b> |
| <b>Actual Positive</b>           | 40 (TP)                   | 0 (FN)                    | 40           |
| <b>Actual Negative</b>           | 2 (FP)                    | 78 (TN)                   | 80           |
| <b>Total</b>                     | 42                        | 78                        | 120          |

  

| Confusion matrix for three classes |                           |                           |              |
|------------------------------------|---------------------------|---------------------------|--------------|
|                                    | <b>Predicted Positive</b> | <b>Predicted Negative</b> | <b>Total</b> |
| <b>Actual Positive</b>             | 40 (TP)                   | 0 (FN)                    | 40           |
| <b>Actual Negative</b>             | 4 (FP)                    | 76 (TN)                   | 80           |
| <b>Total</b>                       | 44                        | 76                        | 120          |

Legend: TP = True Positives; FN = False Negatives; FP = False Positives; TN = True Negatives.
